# Supplementary material
Source: HighWire-hosted journal article supplement (https://www.ghspjournal.org/highwire/filestream/1588/field_highwire_adjunct_files/0/15-00097-Levine-Supplementary-Appendix-1.docx)
Supplement: 15-00097-Levine-Supplementary-Appendix-1.docx [file 15-00097-Levine-Supplementary-Appendix-1.docx]

**Supplemental Appendix 1.** World Health Organization Dehydration Assessment Algorithm


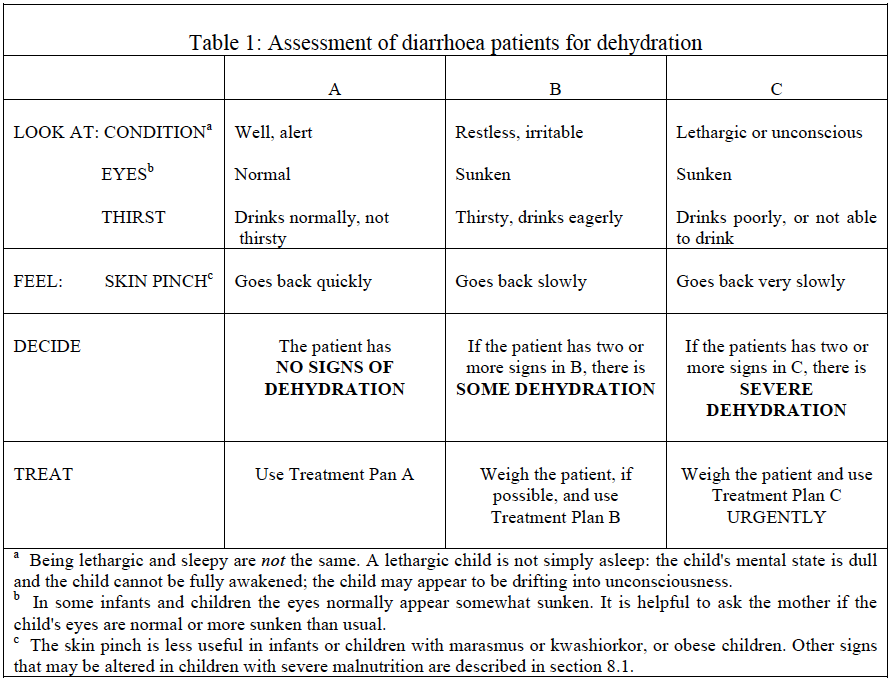


Text in column A, “TREAT” row should read “Use Treatment Plan A”.

Source: World Health Organization (WHO). The treatment of diarrhoea: A manual for physicians and other senior health workers. Geneva: WHO; 2005.
